# Supplementary material for: Patient Preferences and Priorities for the Design of an Acute Kidney Injury Prevention Trial: Findings from a Consensus Workshop
Source: PubMed Central journal article supplement (PMC11556923; doi:10.34067/kid.0000000000000554), 2024-08-15
Supplement: kidney360-5-1455-s001.pdf [file kidney360-5-1455-s001.pdf]

## ASN Journal Disclosure Form

As per ASN journal policy, I have disclosed any financial relationships or commitments I have held in the past 36 months as included below. I have listed my Current Employer below to indicate there is a relationship requiring disclosure. If no relationship exists, my Current Employer is not listed.

D. Acharya reports the following:  
Employer: University of Calgary

I understand that the information above will be published within the journal article, if accepted, and that failure to comply and/or to accurately and completely report the potential financial conflicts of interest could lead to the following: 1) Prior to publication, article rejection, or 2) Post-publication, sanctions ranging from, but not limited to, issuing a correction, reporting the inaccurate information to the authors' institution, banning authors from submitting work to ASN journals for varying lengths of time, and/or retraction of the published work.

Name: Dilaram Acharya

Manuscript ID: K360-2024-000362R1

Manuscript Title: Patient preferences and priorities for the design of an acute kidney injury prevention trial

Date of Completion: June 12, 2024

Disclosure Updated Date: June 12, 2024

## ASN Journal Disclosure Form

As per ASN journal policy, I have disclosed any financial relationships or commitments I have held in the past 36 months as included below. I have listed my Current Employer below to indicate there is a relationship requiring disclosure. If no relationship exists, my Current Employer is not listed.

E. Benterud reports the following:  
Employer: University of Calgary

I understand that the information above will be published within the journal article, if accepted, and that failure to comply and/or to accurately and completely report the potential financial conflicts of interest could lead to the following: 1) Prior to publication, article rejection, or 2) Post-publication, sanctions ranging from, but not limited to, issuing a correction, reporting the inaccurate information to the authors' institution, banning authors from submitting work to ASN journals for varying lengths of time, and/or retraction of the published work.

Name: Eleanor C. Benterud

Manuscript ID: K360-2024-000362R1

Manuscript Title: Patient preferences and priorities for the design of an acute kidney injury prevention trial

Date of Completion: July 6, 2024

Disclosure Updated Date: July 6, 2024

## ASN Journal Disclosure Form

As per ASN journal policy, I have disclosed any financial relationships or commitments I have held in the past 36 months as included below. I have listed my Current Employer below to indicate there is a relationship requiring disclosure. If no relationship exists, my Current Employer is not listed.

D. Birdsell has nothing to disclose.

I understand that the information above will be published within the journal article, if accepted, and that failure to comply and/or to accurately and completely report the potential financial conflicts of interest could lead to the following: 1) Prior to publication, article rejection, or 2) Post-publication, sanctions ranging from, but not limited to, issuing a correction, reporting the inaccurate information to the authors' institution, banning authors from submitting work to ASN journals for varying lengths of time, and/or retraction of the published work.

Name: Dale C Birdsell

Manuscript ID: K360-2024-000362R1

Manuscript Title: Patient preferences and priorities for the design of an acute kidney injury prevention trial

Date of Completion: July 2, 2024

Disclosure Updated Date: June 20, 2024

## ASN Journal Disclosure Form

As per ASN journal policy, I have disclosed any financial relationships or commitments I have held in the past 36 months as included below. I have listed my Current Employer below to indicate there is a relationship requiring disclosure. If no relationship exists, my Current Employer is not listed.

H. Dumka reports the following:  
Employer: University of Calgary

I understand that the information above will be published within the journal article, if accepted, and that failure to comply and/or to accurately and completely report the potential financial conflicts of interest could lead to the following: 1) Prior to publication, article rejection, or 2) Post-publication, sanctions ranging from, but not limited to, issuing a correction, reporting the inaccurate information to the authors' institution, banning authors from submitting work to ASN journals for varying lengths of time, and/or retraction of the published work.

Name: Heather Dumka

Manuscript ID: K360-2024-000362R1

Manuscript Title: Patient preferences and priorities for the design of an acute kidney injury prevention trial

Date of Completion: July 3, 2024

Disclosure Updated Date: May 21, 2024

## ASN Journal Disclosure Form

As per ASN journal policy, I have disclosed any financial relationships or commitments I have held in the past 36 months as included below. I have listed my Current Employer below to indicate there is a relationship requiring disclosure. If no relationship exists, my Current Employer is not listed.

M. Elliott reports the following:

Employer: University of Calgary; and Advisory or Leadership Role: Associate Editor for the Canadian Journal of Kidney Health and Disease.

I understand that the information above will be published within the journal article, if accepted, and that failure to comply and/or to accurately and completely report the potential financial conflicts of interest could lead to the following: 1) Prior to publication, article rejection, or 2) Post-publication, sanctions ranging from, but not limited to, issuing a correction, reporting the inaccurate information to the authors' institution, banning authors from submitting work to ASN journals for varying lengths of time, and/or retraction of the published work.

Name: Meghan J. Elliott

Manuscript ID: K360-2024-000362R1

Manuscript Title: Patient preferences and priorities for the design of an acute kidney injury prevention trial

Date of Completion: June 12, 2024

Disclosure Updated Date: May 20, 2024

## ASN Journal Disclosure Form

As per ASN journal policy, I have disclosed any financial relationships or commitments I have held in the past 36 months as included below. I have listed my Current Employer below to indicate there is a relationship requiring disclosure. If no relationship exists, my Current Employer is not listed.

K. Fiest has nothing to disclose.

I understand that the information above will be published within the journal article, if accepted, and that failure to comply and/or to accurately and completely report the potential financial conflicts of interest could lead to the following: 1) Prior to publication, article rejection, or 2) Post-publication, sanctions ranging from, but not limited to, issuing a correction, reporting the inaccurate information to the authors' institution, banning authors from submitting work to ASN journals for varying lengths of time, and/or retraction of the published work.

Name: Kirsten Fiest

Manuscript ID: K360-2024-000362R1

Manuscript Title: Patient preferences and priorities for the design of an acute kidney injury prevention trial

Date of Completion: June 13, 2024

Disclosure Updated Date: June 13, 2024

## ASN Journal Disclosure Form

As per ASN journal policy, I have disclosed any financial relationships or commitments I have held in the past 36 months as included below. I have listed my Current Employer below to indicate there is a relationship requiring disclosure. If no relationship exists, my Current Employer is not listed.

S. Gil has nothing to disclose.

I understand that the information above will be published within the journal article, if accepted, and that failure to comply and/or to accurately and completely report the potential financial conflicts of interest could lead to the following: 1) Prior to publication, article rejection, or 2) Post-publication, sanctions ranging from, but not limited to, issuing a correction, reporting the inaccurate information to the authors' institution, banning authors from submitting work to ASN journals for varying lengths of time, and/or retraction of the published work.

Name: Sarah Gil

Manuscript ID: K360-2024-000362R1

Manuscript Title: Patient preferences and priorities for the design of an acute kidney injury prevention trial

Date of Completion: June 11, 2024

Disclosure Updated Date: June 11, 2024

## ASN Journal Disclosure Form

As per ASN journal policy, I have disclosed any financial relationships or commitments I have held in the past 36 months as included below. I have listed my Current Employer below to indicate there is a relationship requiring disclosure. If no relationship exists, my Current Employer is not listed.

T. Harrison reports the following:

Employer: University of Calgary, Alberta, Canada; Ownership Interest: Apple, Disney; and Advisory or Leadership Role: Canadian Society of Nephrology Board member; Canadian Society of Nephrology Clinical Practice Guidelines Chair.

I understand that the information above will be published within the journal article, if accepted, and that failure to comply and/or to accurately and completely report the potential financial conflicts of interest could lead to the following: 1) Prior to publication, article rejection, or 2) Post-publication, sanctions ranging from, but not limited to, issuing a correction, reporting the inaccurate information to the authors' institution, banning authors from submitting work to ASN journals for varying lengths of time, and/or retraction of the published work.

Name: Tyrone Harrison

Manuscript ID: K360-2024-000362R1

Manuscript Title: Patient preferences and priorities for the design of an acute kidney injury prevention trial

Date of Completion: June 11, 2024

Disclosure Updated Date: May 16, 2024



## ASN Journal Disclosure Form

As per ASN journal policy, I have disclosed any financial relationships or commitments I have held in the past 36 months as included below. I have listed my Current Employer below to indicate there is a relationship requiring disclosure. If no relationship exists, my Current Employer is not listed.

M. James reports the following:  
Employer: University of Calgary

I understand that the information above will be published within the journal article, if accepted, and that failure to comply and/or to accurately and completely report the potential financial conflicts of interest could lead to the following: 1) Prior to publication, article rejection, or 2) Post-publication, sanctions ranging from, but not limited to, issuing a correction, reporting the inaccurate information to the authors' institution, banning authors from submitting work to ASN journals for varying lengths of time, and/or retraction of the published work.

Name: Matthew T. James

Manuscript ID: K360-2024-000362R1

Manuscript Title: Patient preferences and priorities for the design of an acute kidney injury prevention trial

Date of Completion: June 12, 2024

Disclosure Updated Date: June 12, 2024

## ASN Journal Disclosure Form

As per ASN journal policy, I have disclosed any financial relationships or commitments I have held in the past 36 months as included below. I have listed my Current Employer below to indicate there is a relationship requiring disclosure. If no relationship exists, my Current Employer is not listed.

M. Loth has nothing to disclose.

I understand that the information above will be published within the journal article, if accepted, and that failure to comply and/or to accurately and completely report the potential financial conflicts of interest could lead to the following: 1) Prior to publication, article rejection, or 2) Post-publication, sanctions ranging from, but not limited to, issuing a correction, reporting the inaccurate information to the authors' institution, banning authors from submitting work to ASN journals for varying lengths of time, and/or retraction of the published work.

Name: Maureena Loth

Manuscript ID: K360-2024-000362R1

Manuscript Title: Patient preferences and priorities for the design of an acute kidney injury prevention trial

Date of Completion: July 2, 2024

Disclosure Updated Date: June 25, 2024

## ASN Journal Disclosure Form

As per ASN journal policy, I have disclosed any financial relationships or commitments I have held in the past 36 months as included below. I have listed my Current Employer below to indicate there is a relationship requiring disclosure. If no relationship exists, my Current Employer is not listed.

S. Love reports the following:

Employer: University of Calgary

I understand that the information above will be published within the journal article, if accepted, and that failure to comply and/or to accurately and completely report the potential financial conflicts of interest could lead to the following: 1) Prior to publication, article rejection, or 2) Post-publication, sanctions ranging from, but not limited to, issuing a correction, reporting the inaccurate information to the authors' institution, banning authors from submitting work to ASN journals for varying lengths of time, and/or retraction of the published work.

Name: Shannan Love

Manuscript ID: K360-2024-000362R1

Manuscript Title: Patient preferences and priorities for the design of an acute kidney injury prevention trial

Date of Completion: June 12, 2024

Disclosure Updated Date: June 12, 2024

## ASN Journal Disclosure Form

As per ASN journal policy, I have disclosed any financial relationships or commitments I have held in the past 36 months as included below. I have listed my Current Employer below to indicate there is a relationship requiring disclosure. If no relationship exists, my Current Employer is not listed.

N. Pannu reports the following:

Employer: University of Alberta; Alberta Health Services; Honoraria: Alexion - for a advisory meeting; and Other Interests or Relationships: Amgen: funded quality improvement initiative in ESKD.

I understand that the information above will be published within the journal article, if accepted, and that failure to comply and/or to accurately and completely report the potential financial conflicts of interest could lead to the following: 1) Prior to publication, article rejection, or 2) Post-publication, sanctions ranging from, but not limited to, issuing a correction, reporting the inaccurate information to the authors' institution, banning authors from submitting work to ASN journals for varying lengths of time, and/or retraction of the published work.

Name: Neesh I. Pannu

Manuscript ID: K360-2024-000362R1

Manuscript Title: Patient preferences and priorities for the design of an acute kidney injury prevention trial

Date of Completion: June 12, 2024

Disclosure Updated Date: June 12, 2024

## ASN Journal Disclosure Form

As per ASN journal policy, I have disclosed any financial relationships or commitments I have held in the past 36 months as included below. I have listed my Current Employer below to indicate there is a relationship requiring disclosure. If no relationship exists, my Current Employer is not listed.

B. Rana has nothing to disclose.

I understand that the information above will be published within the journal article, if accepted, and that failure to comply and/or to accurately and completely report the potential financial conflicts of interest could lead to the following: 1) Prior to publication, article rejection, or 2) Post-publication, sanctions ranging from, but not limited to, issuing a correction, reporting the inaccurate information to the authors' institution, banning authors from submitting work to ASN journals for varying lengths of time, and/or retraction of the published work.

Name: Benny Rana

Manuscript ID: K360-2024-000362R1

Manuscript Title: Patient preferences and priorities for the design of an acute kidney injury prevention trial

Date of Completion: July 3, 2024

Disclosure Updated Date: July 3, 2024

## ASN Journal Disclosure Form

As per ASN journal policy, I have disclosed any financial relationships or commitments I have held in the past 36 months as included below. I have listed my Current Employer below to indicate there is a relationship requiring disclosure. If no relationship exists, my Current Employer is not listed.

N. Shommu has nothing to disclose.

I understand that the information above will be published within the journal article, if accepted, and that failure to comply and/or to accurately and completely report the potential financial conflicts of interest could lead to the following: 1) Prior to publication, article rejection, or 2) Post-publication, sanctions ranging from, but not limited to, issuing a correction, reporting the inaccurate information to the authors' institution, banning authors from submitting work to ASN journals for varying lengths of time, and/or retraction of the published work.

Name: Nusrat Shommu

Manuscript ID: K360-2024-000362R1

Manuscript Title: Patient preferences and priorities for the design of an acute kidney injury prevention trial

Date of Completion: July 2, 2024

Disclosure Updated Date: July 2, 2024
